# Supplementary material for: An efficient and stable iodine-doped nickel hydroxide electrocatalyst for water oxidation: synthesis, electrochemical performance, and stability
Source: Royal Society of Chemistry journal article supplement (doi:10.1039/d2ra03873k), 2022-01-01
Supplement: d2ra03873k1.pdf [file d2ra03873k1.pdf]

Electronic Supplementary Information for

## **Efficient and Stable Iodine doped Nickel-Hydroxide Electrocatalyst for Water Oxidation: Synthesis, Electrochemical Performance and Stability**

Sheraz Yousaf<sup>a</sup>, Sonia Zulfiqar<sup>b</sup>, H.H. Somoily<sup>c,d</sup>, Muhammad Farooq Warsi<sup>a\*</sup>, Aamir Rasheed<sup>a</sup>, Muhammad Shahid<sup>c</sup>, Iqbal Ahmad<sup>f\*</sup>.

<sup>a</sup>Institute of Chemistry, Baghdad-ul-Jadeed Campus, The Islamia University of Bahawalpur, Bahawalpur,-63100, Pakistan

<sup>b</sup>Department of Chemistry, School of Sciences & Engineering, The American University in Cairo, New Cairo, 11835, Egypt

<sup>c</sup>Research Center for Advanced Materials Science (RCAMS), King Khalid University, Abha 61413, P.O. Box 9004, Saudi Arabia.

<sup>d</sup>Department of Physics, Faculty of Science, King Khalid University, P.O. Box 9004, Abha, Saudi Arabia.

<sup>e</sup>Department of Chemistry, College of Science, University of Hafr Al Batin, P.O.Box 1803, Hafr Al Batin, 31991, Saudi Arabia

<sup>f</sup>Department of Chemistry, Allama Iqbal Open University, Islamabad, 44000, Pakistan

**Corresponding author:** ([Farooq.warsi@iub.edu.pk](mailto:Farooq.warsi@iub.edu.pk)), ([Iqbal.ahmad@aiou.edu.pk](mailto:Iqbal.ahmad@aiou.edu.pk)).

### **Materials and methods**

All the chemicals used during synthesis to applications prospects were of analytical grade and utilized as such as received. The P-XRD analysis was carried out using Lab XRD-6100. The FTIR analysis was done using IRAffinity-1s. The FESEM analysis was carried out on ZEISS LEO SUPRA 55 and EDX was done by JEOL JCM-6000Plus SEM. The BET analysis was done on Micromeritics ASAP 2020 physisorption analyzer. The electrochemical measurements were done using Gamry 5000E potentiostat using three electrode system. Ag/AgCl as a reference electrode,

Pt wire as a counter electrode. One molar aqueous solution of KOH was used as an electrolyte. All the potentials taken vs Ag/AgCl were converted to RHE potentials using equation.

$$E_{\text{RHE}} = E_{\text{Ag/AgCl}} + 0.059 \text{ pH} + E_{\text{Ag/AgCl}}^0$$

### **Synthesis of electrocatalysts**

The iodine doped Ni(OH)<sub>2</sub> was synthesized by one step hydrothermal method. In this process, 0.2 M nickel nitrate hexahydrate and KI solutions were mixed in an appropriate ratio. The mixture was stirred under constant stirring and 0.2 M NaOH aqueous solution was added to it dropwise till precipitation starts. After this, the mixture was continuously stirred for 2 hours and incubated in autoclave for 24 hours at 160 °C. After the completion of incubation period, the precipitates were washed with distilled water and dried at 60 °C. The resultant product was called as I; Ni(OH)<sub>2</sub>. Similar method was also adopted for the synthesis of pure Ni(OH)<sub>2</sub>. The prepared pure Ni(OH)<sub>2</sub> was mixed with 16 mg alcoholic solution of pure iodine in pestle mortar and called as I<sub>2</sub>: Ni(OH)<sub>2</sub>.

### **Preparation of electrode material**

A measured piece of carbon fiber cloth (CFC) was taken and washed with ethanol, acetone and then with distilled water. The 15 mg of catalysts powder was taken in glass vial and 100 μL of distilled water was added. The mixture was sonicated for 2 hours and 10 μL of catalysts ink was drop casted on 1 cm<sup>2</sup> selected area of CFC.

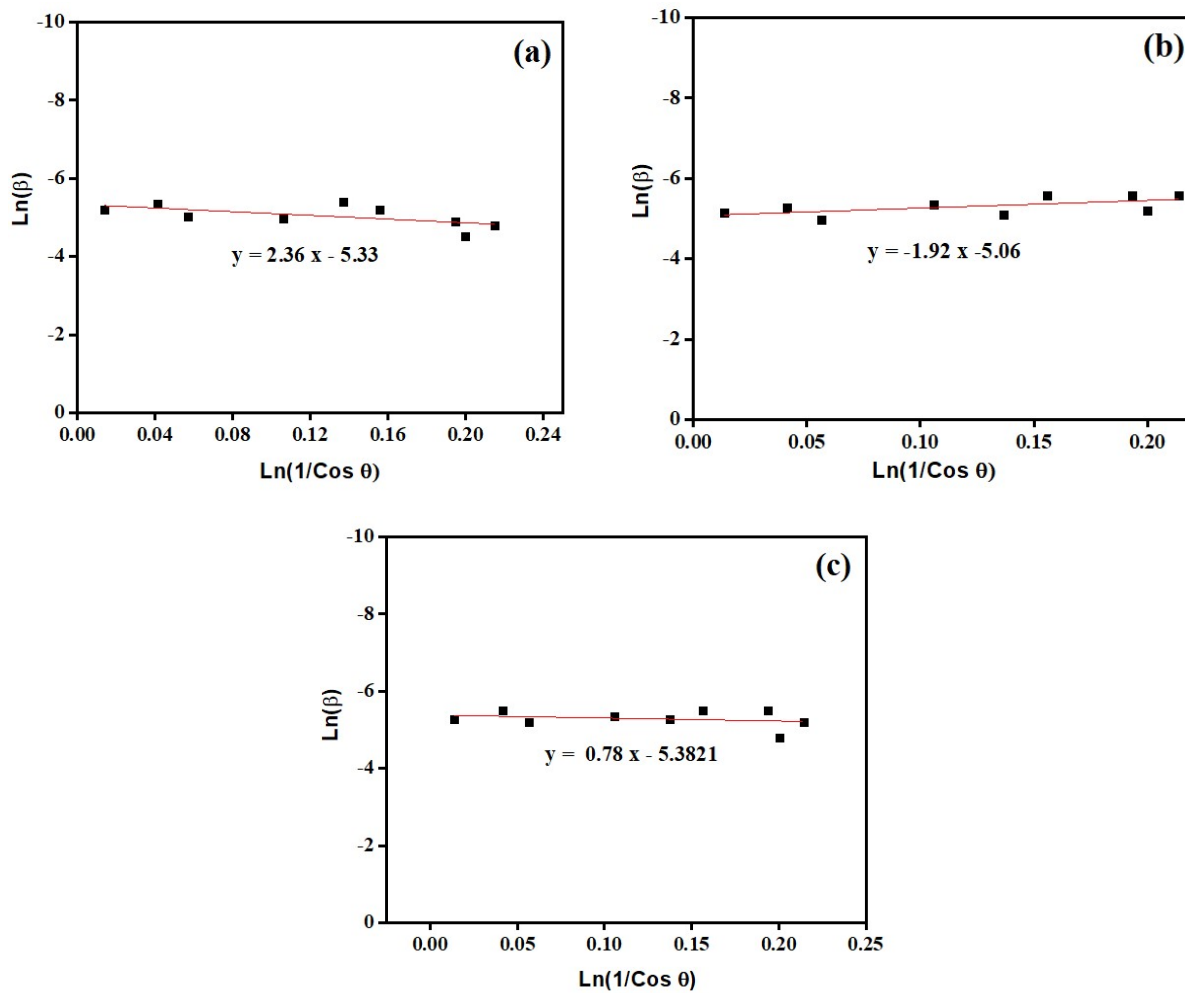

**Figure S1:** Sherer plot of a)  $\text{Ni}(\text{OH})_2$ , b) Iodine doped  $\text{Ni}(\text{OH})_2$  and c) Iodine loaded  $\text{Ni}(\text{OH})_2$  electrocatalysts.

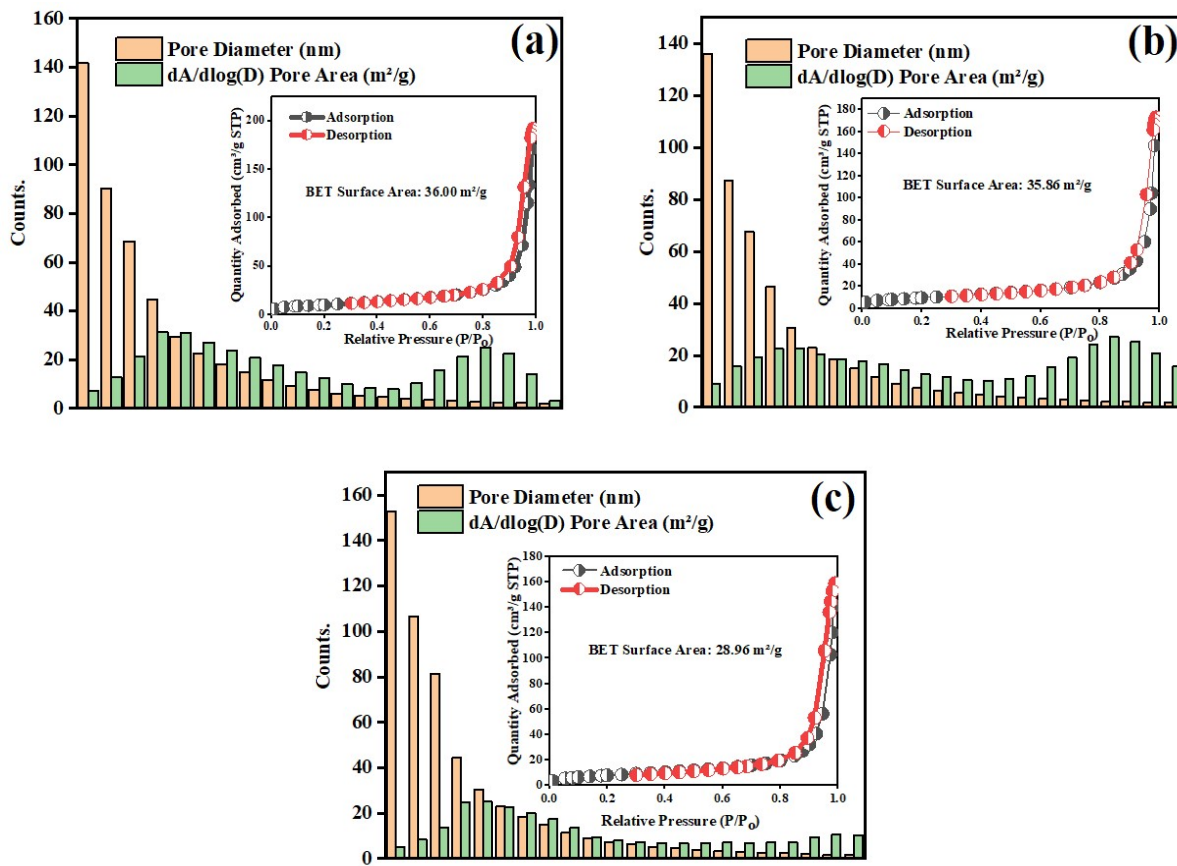

**Figure S2:** Bar-graph showing pore diameter and pore area of a)  $Ni(OH)_2$ , b) Iodine doped  $Ni(OH)_2$  and c) Iodine loaded  $Ni(OH)_2$  electrocatalysts and inset shows their relative BET plots.

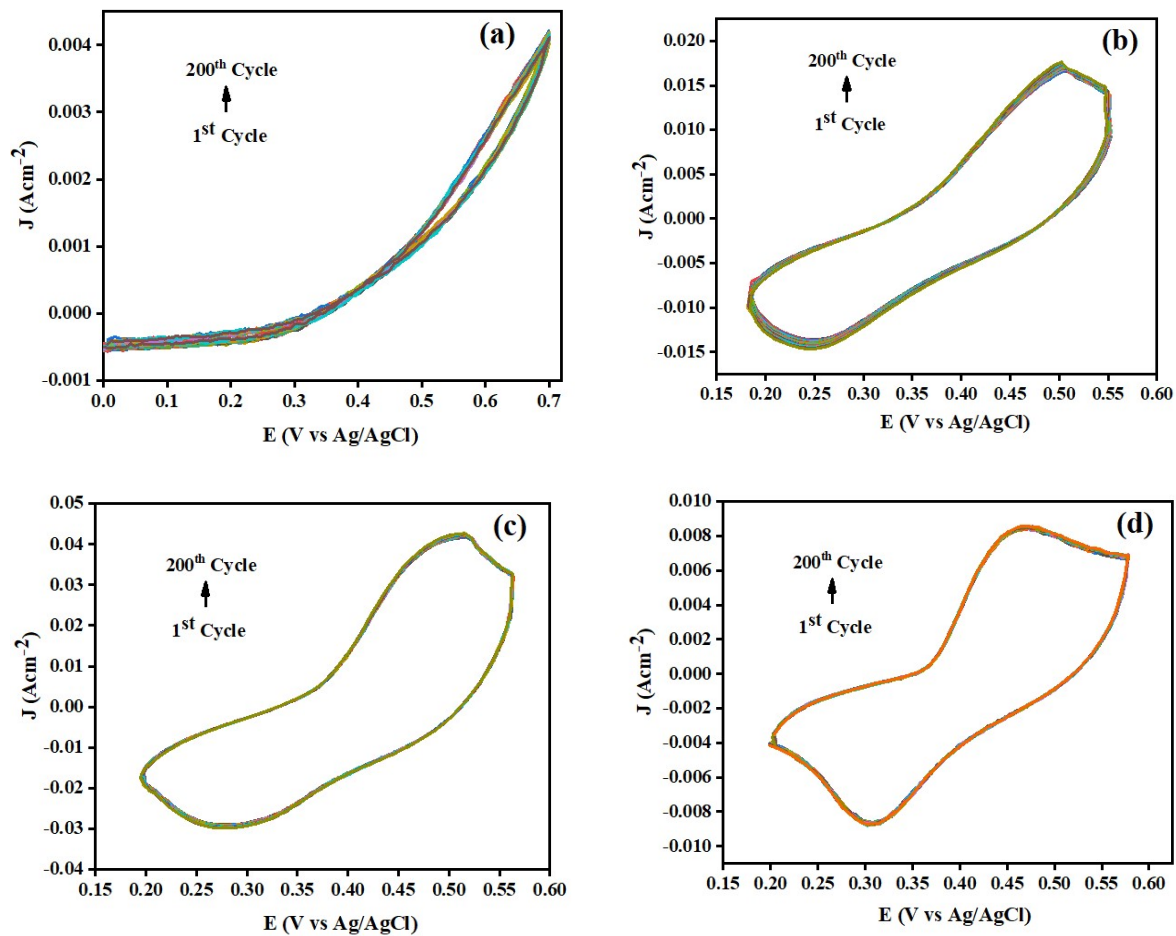

**Figure S3:** Cyclic voltammogram representing for 1<sup>st</sup>, 10<sup>th</sup>, 20<sup>th</sup>, and up to 200<sup>th</sup> cycles for a)  $\text{Ni}(\text{OH})_2$ , b) Iodine doped  $\text{Ni}(\text{OH})_2$  and c) Iodine loaded  $\text{Ni}(\text{OH})_2$  electrocatalysts.

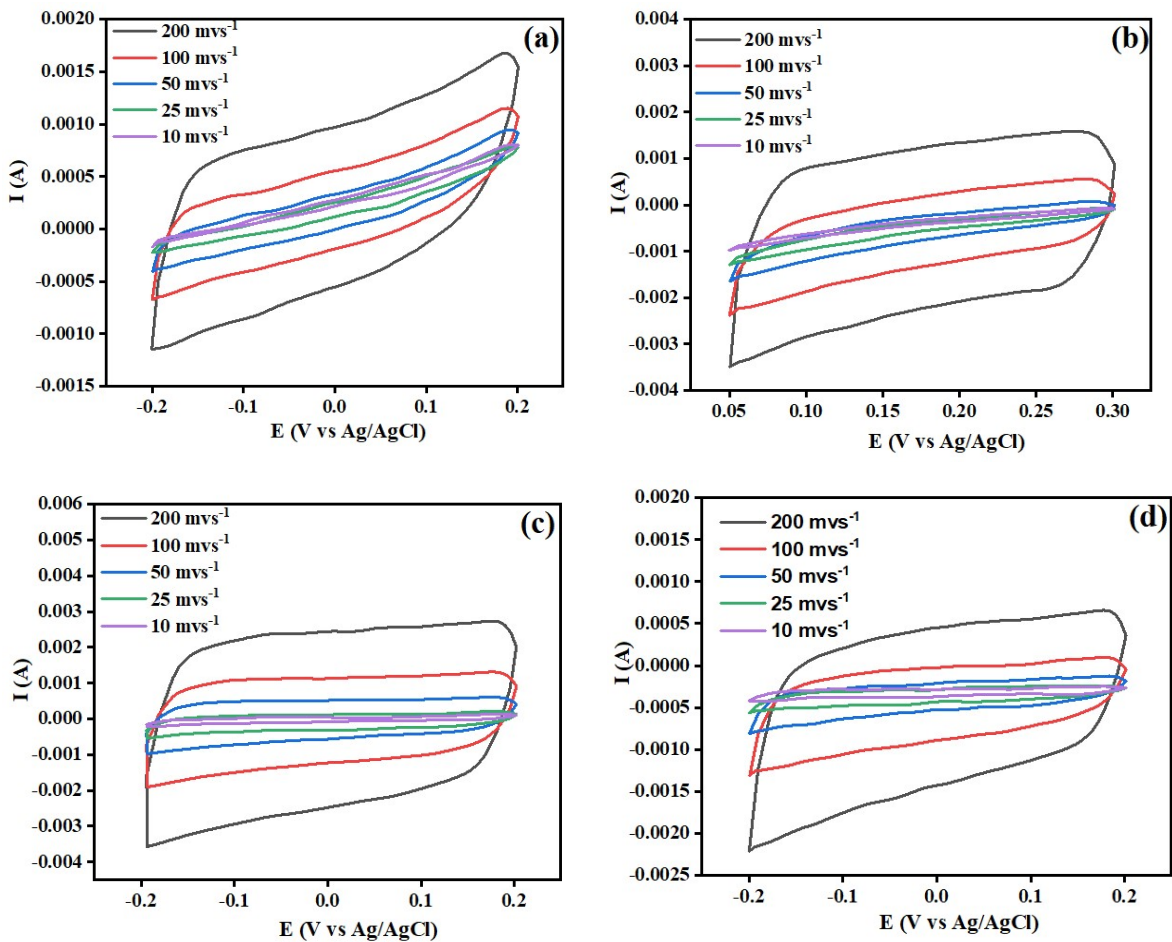

**Figure S4:** Cyclic voltammogram for calculation of electrochemical active surface area for a)  $\text{Ni}(\text{OH})_2$ , b) Iodine doped  $\text{Ni}(\text{OH})_2$  and c) Iodine loaded  $\text{Ni}(\text{OH})_2$  electrocatalysts.

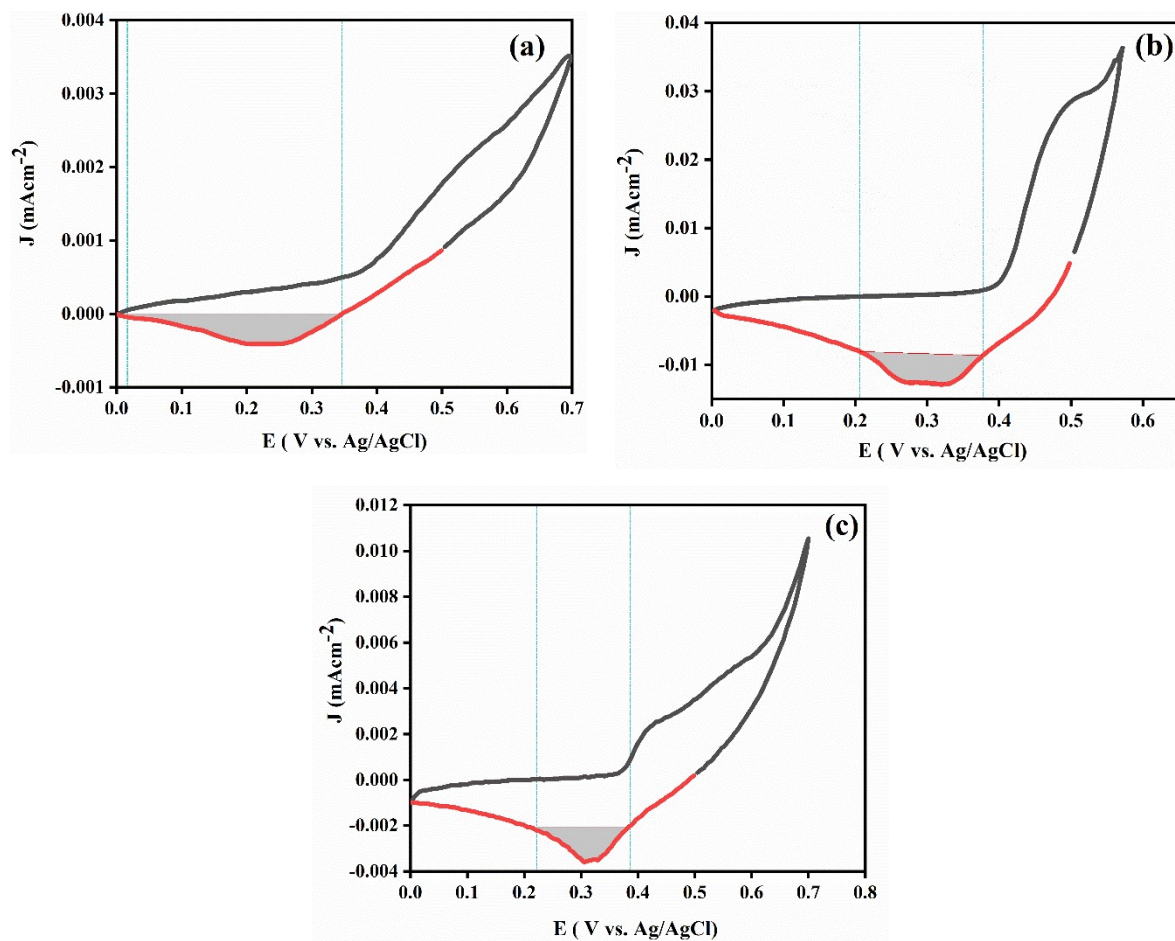

**Figure S5:** CV curve showing area under reduction peak for a)  $\text{Ni(OH)}_2$ , b) Iodine doped  $\text{Ni(OH)}_2$  and c) Iodine loaded  $\text{Ni(OH)}_2$  electrocatalysts.

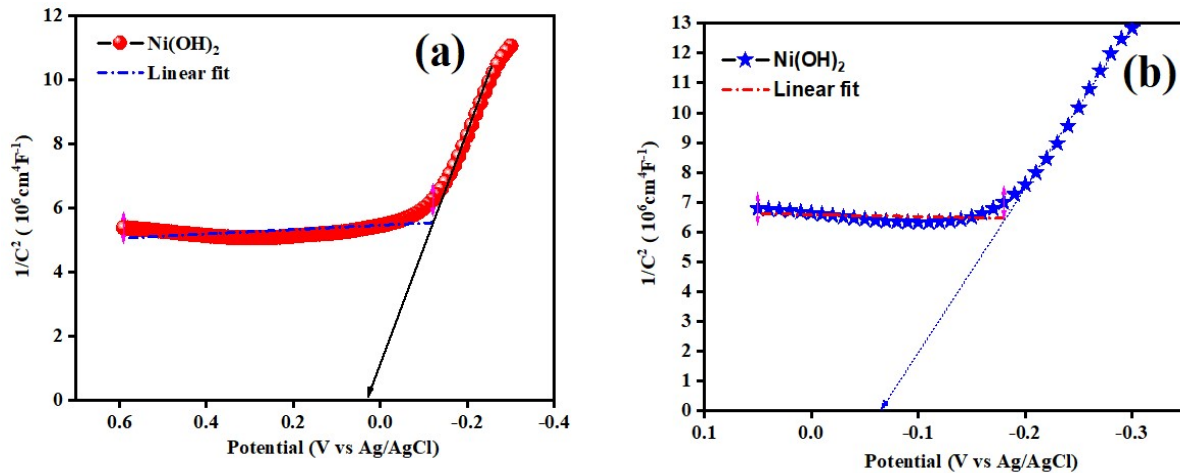

**Figure S6:** Mott-Schottky plots of the a)  $\text{Ni}(\text{OH})_2$  and b)  $\text{I-Ni}(\text{OH})_2$ .

**Table S1:** FTIR and Mott-Schottky results of  $\text{Ni}(\text{OH})_2$ , Iodine doped  $\text{Ni}(\text{OH})_2$  and Iodine loaded  $\text{Ni}(\text{OH})_2$  electrocatalysts.

| S. N | Material                             | FTIR Vibrations( $\text{cm}^{-1}$ ) |         |      | Flat band potential<br>(V) | Carrier density<br>( $\times 10^{31} \text{cm}^{-3}$ ) |
|------|--------------------------------------|-------------------------------------|---------|------|----------------------------|--------------------------------------------------------|
|      |                                      | O-H                                 | Ni-O-Ni | Ni-O |                            |                                                        |
| 1    | $\text{Ni}(\text{OH})_2$             | 3635                                | 483     | 426  | 0.03                       | 9.82                                                   |
| 2    | $\text{I: Ni}(\text{OH})_2$          | 3635                                | 494     | 432  | -0.064                     | 10.2                                                   |
| 3    | $\text{I}_2: \text{Ni}(\text{OH})_2$ | 3635                                | 498     | 430  | --                         | --                                                     |
